# Supplementary material for: Effect of inoculum percentage and hydrogen supply on hydrogenotrophic denitrification driven by anaerobic granular sludge
Source: Royal Society of Chemistry journal article supplement (doi:10.1039/d4ew00776j), 2025-01-01
Supplement: d4ew00776j3.pdf [file d4ew00776j3.pdf]

**Supporting material accompanying the manuscript:**

**Effect of inoculum percentage and hydrogen supply on hydrogenotrophic denitrification driven by anaerobic granular sludge**

**Table S1** – Nitrate concentration values detected using different inoculum percentages, i.e., 10% (I10), 20% (I20) and 40% (I40) (v/v) and for control tests. All data are reported for the triplicate.

|                 |                 | <b>NO<sub>3</sub><sup>-</sup> concentration (mg NO<sub>3</sub><sup>-</sup>/L)</b> |              |              |              |              |              |              |              |              |              |              |              |              |              |              |              |              |              |
|-----------------|-----------------|-----------------------------------------------------------------------------------|--------------|--------------|--------------|--------------|--------------|--------------|--------------|--------------|--------------|--------------|--------------|--------------|--------------|--------------|--------------|--------------|--------------|
| <b>Cycle</b>    | <b>Time (d)</b> | <b>C10.1</b>                                                                      | <b>C10.2</b> | <b>C10.3</b> | <b>C20.1</b> | <b>C20.2</b> | <b>C20.3</b> | <b>C40.1</b> | <b>C40.2</b> | <b>C40.3</b> | <b>I10.1</b> | <b>I10.2</b> | <b>I10.3</b> | <b>I20.1</b> | <b>I20.2</b> | <b>I20.3</b> | <b>I40.1</b> | <b>I40.2</b> | <b>I40.3</b> |
| 1 <sup>st</sup> | 0               | 223.4                                                                             | 200.3        | 218.4        | 199.7        | 211.3        | 224.4        | 238.7        | 199.8        | 216.9        | 199.4        | 195.8        | 219.6        | 198.5        | 200.7        | 206.9        | 214.9        | 207.3        | 208.2        |
|                 | 1               | 171.1                                                                             | 194.3        | 193.1        | 202.9        | 158.9        | 180.7        | 162.2        | 140.1        | 186.4        | 168.7        | 182.6        | 176.8        | 178.3        | 171.9        | 163.7        | 116.9        | 159.9        | 135.4        |
|                 | 3               | 166.7                                                                             | 156.5        | 201.7        | 109.4        | 105.4        | 163.5        | 96.6         | 25.0         | 107.0        | 103.5        | 129.5        | 109.9        | 38.4         | 12.1         | 21.6         | 50.4         | 13.7         | 21.0         |
|                 | 6               | 153.1                                                                             | 146.2        | 139.2        | 63.1         | 50.1         | 67.3         | 5.0          | 2.3          | 4.0          | 4.6          | 39.4         | 5.5          | 28.9         | 14.2         | 6.5          | 2.0          | 7.3          | 2.2          |
| 2 <sup>nd</sup> | 0               | 190.7                                                                             | 206.7        |              | 195.1        | 193.0        | 208.2        | 188.7        |              | 215.0        | 206.0        | 216.9        |              | 180.2        | 173.1        | 208.0        | 216.0        | 218.9        | 227.2        |
|                 | 1               | 211.5                                                                             |              | 209.1        |              | 183.7        | 192.4        | 156.3        | 140.6        | 198.4        | 188.7        | 129.2        | 217.3        | 187.1        | 123.7        | 174.5        | 179.2        | 188.5        | 168.5        |
|                 | 3               | 217.0                                                                             | 186.0        | 186.5        | 159.3        | 168.3        | 132.7        | 67.4         | 81.5         | 161.6        | 129.0        | 25.3         | 109.0        | 103.1        | 36.7         | 48.2         | 24.3         |              | 29.7         |
|                 | 6               | 160.7                                                                             | 183.6        | 181.7        | 88.7         | 93.5         | 59.4         | 34.7         | 15.4         | 30.8         | 10.2         | 9.5          | 6.7          | 4.7          | 9.8          | 6.9          | 15.8         | 23.1         | 22.5         |
| 3 <sup>rd</sup> | 0               | 223.4                                                                             | 211.0        | 183.2        | 198.2        | 211.7        | 228.5        | 200.7        | 213.4        | 223.0        | 202.5        |              | 181.4        | 206.7        | 229.4        |              | 225.4        | 198.5        | 229.8        |
|                 | 1               | 152.4                                                                             |              | 200.2        | 176.5        | 199.6        | 207.9        | 148.2        | 192.3        | 166.0        | 180.5        | 207.4        |              | 139.0        | 128.9        |              | 214.7        | 157.0        | 227.7        |
|                 | 3               | 198.5                                                                             |              | 158.6        | 156.6        | 130.0        | 164.7        | 84.0         | 93.0         | 89.1         | 92.8         | 172.2        |              |              | 112.5        | 140.5        | 12.2         | 89.7         | 99.9         |
|                 | 6               | 169.5                                                                             |              | 141.3        | 101.6        | 81.9         | 87.8         | 6.9          | 39.0         | 8.3          | 13.4         | 40.6         |              | 123.8        | 112.6        | 104.3        | 9.7          | 12.7         | 12.7         |

**Table S2** – Nitrate concentration values detected for the different hydrogen supply, i.e., stoichiometric (Hst), 50% in excess (H50), and 100% in excess (H100) and in control test. All data are reported for the triplicate.

| <b>NO<sub>3</sub><sup>-</sup> concentration (mg NO<sub>3</sub><sup>-</sup>/L)</b> |                 |            |            |            |              |              |              |              |              |              |               |               |               |
|-----------------------------------------------------------------------------------|-----------------|------------|------------|------------|--------------|--------------|--------------|--------------|--------------|--------------|---------------|---------------|---------------|
| <b>Cycle</b>                                                                      | <b>Time (d)</b> | <b>C.1</b> | <b>C.2</b> | <b>C.3</b> | <b>Hst.1</b> | <b>Hst.2</b> | <b>Hst.3</b> | <b>H50.1</b> | <b>H50.2</b> | <b>H50.3</b> | <b>H100.1</b> | <b>H100.2</b> | <b>H100.3</b> |
| 1 <sup>st</sup>                                                                   | 0               | 198.0      | 184.9      | 169.7      | 194.4        | 190.9        | 192.8        | 190.4        | 188.3        | 199.5        | 209.5         | 188.6         | 186.9         |
|                                                                                   | 1               | 151.3      | 166.4      | 133.2      | 143.2        |              | 163.3        | 168.6        | 164.4        | 144.9        | 186.8         | 145.1         | 184.0         |
|                                                                                   | 3               | 109.8      | 150.7      | 128.8      | 89.2         | 97.3         | 109.2        | 108.5        | 84.8         | 109.2        | 104.6         | 69.5          | 92.1          |
|                                                                                   | 6               | 93.8       | 88.1       | 71.9       | 42.6         | 19.3         | 9.7          | 20.3         | 22.4         | 13.6         | 11.4          | 9.0           | 25.0          |
| 2 <sup>nd</sup>                                                                   | 0               | 187.5      | 202.8      | 161.7      | 187.8        | 199.7        | 200.0        | 203.8        | 210.6        | 193.4        | 203.4         | 198.0         |               |
|                                                                                   | 1               | 187.0      | 114.6      | 178.8      | 191.8        | 155.3        | 137.9        | 133.9        | 129.2        | 142.3        | 118.8         | 178.7         | 128.1         |
|                                                                                   | 3               | 187.1      | 156.2      | 146.4      | 53.6         | 39.8         | 76.6         | 29.9         | 48.8         | 11.5         | 14.1          | 46.8          | 19.1          |
|                                                                                   | 6               | 87.1       | 111.7      | 67.0       | 11.3         | 7.8          | 32.2         | 5.9          | 5.6          | 19.0         | 6.6           | 8.5           | 12.9          |
| 3 <sup>rd</sup>                                                                   | 0               | 201.3      | 229.3      | 192.9      | 194.0        | 202.2        | 197.3        | 198.2        | 179.3        | 201.2        | 194.1         | 202.5         | 206.0         |
|                                                                                   | 1               | 211.8      | 194.3      |            | 190.2        | 192.0        |              | 188.5        |              | 206.3        | 148.0         | 159.3         |               |
|                                                                                   | 3               | 111.9      | 137.4      | 208.4      | 97.1         | 149.6        | 155.7        | 60.9         | 104.9        | 47.0         | 34.4          | 123.8         | 17.7          |
|                                                                                   | 6               | 84.7       | 70.4       | 117.9      | 38.4         | 60.1         | 48.5         | 24.5         | 35.5         | 49.4         | 27.2          | 33.3          | 16.2          |

**Table S3** – Inorganic and organic carbon concentration at the initial and final day of the hydrogenotrophic denitrification tests for the three different cycles. First set of experiments (fixed hydrogen (H<sub>2</sub>) supply 50% in excess compared to the stoichiometry): I10 (10% (v/v) inoculum percentage), I20 (20% (v/v) inoculum percentage), and I40 (40% (v/v) inoculum percentage). Second set of experiments (fixed inoculum percentage of 10% (v/v)): Hst (stoichiometric H<sub>2</sub> supply), H50 (H<sub>2</sub> supply 50% in excess compared to the stoichiometry), and H100 (H<sub>2</sub> supply 100% in excess compared to the stoichiometry).

| ID Test | Cycle | Starting day            |                       | Final day               |                       |
|---------|-------|-------------------------|-----------------------|-------------------------|-----------------------|
|         |       | Inorganic Carbon (mg/L) | Organic Carbon (mg/L) | Inorganic Carbon (mg/L) | Organic Carbon (mg/L) |
| I10     | 1     | 59.7 ± 2.5              | Not detected          | 82.2 ± 12.0             | 21.5 ± 10.2           |
|         | 2     | 60.1 ± 5.5              | 3.6 ± 1.9             | 93.9 ± 24.9             | 15.4 ± 11.6           |
|         | 3     | 47.6 ± 10.5             | Not detected          | 73.9 ± 2.2              | 12.1 ± 1.2            |
| I20     | 1     | 40.8 ± 3.4              | 3.3 ± 1.2             | 95.7 ± 1.6              | 36.7 ± 7.6            |
|         | 2     | 42.7 ± 34.9             | 18.0 ± 16.1           | 97.3 ± 6.0              | 22.4 ± 2.1            |
|         | 3     | 48.5 ± 8.7              | Not detected          | 80.3 ± 7.3              | 15.4 ± 3.7            |
| I40     | 1     | 53.3 ± 9.9              | Not detected          | 21.4 ± 14.6             | 129.7 ± 21.1          |
|         | 2     | 56.9 ± 6.6              | 11.1 ± 1.2            | 113.3 ± 8.7             | 33.1 ± 2.2            |
|         | 3     | 71.8 ± 17.4             | 0.4 ± 0.6             | 62.1 ± 11.6             | 13.7 ± 1.2            |
| Hst     | 1     | 19.8 ± 1.8              | Not detected          | 46.1 ± 7.2              | 65.4 ± 21.3           |
|         | 2     | 79.4 ± 8.6              | 10.5 ± 2.1            | 2.2 ± 1.4               | 14.2 ± 1.2            |
|         | 3     | 75.2 ± 6.4              | 6.6 ± 3.3             | 73.4 ± 15.9             | 20.2 ± 5.2            |
| H50     | 1     | 18.7 ± 1.2              | Not detected          | 46.3 ± 2.0              | 66.4 ± 35.5           |
|         | 2     | 70.1 ± 5.8              | 5.8 ± 3.6             | 8.1 ± 1.3               | 32.8 ± 1.3            |
|         | 3     | 78.3 ± 12.6             | 2.2 ± 1.1             | 84.6 ± 8.3              | 34.8 ± 5.2            |
| H100    | 1     | 20.7 ± 3.5              | Not detected          | 48.4 ± 3.1              | 36.2 ± 10.6           |
|         | 2     | 66.4 ± 4.9              | Not detected          | 2.2 ± 0.0               | 23.4 ± 1.6            |
|         | 3     | 76.8 ± 14.2             | 4.7 ± 1.7             | 93.2 ± 12.9             | 17.3 ± 5.7            |

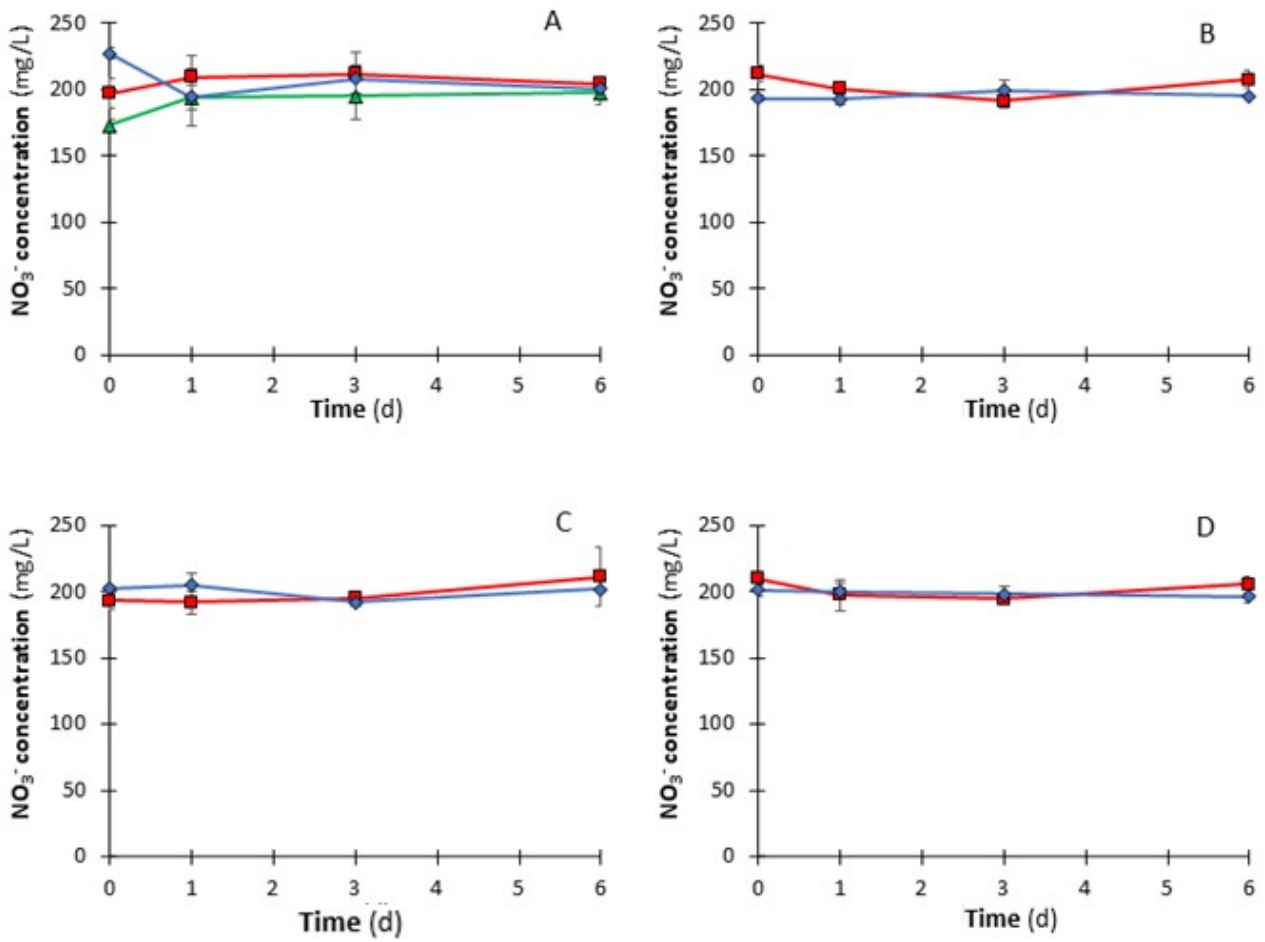

**Figure S1** – Nitrate ( $\text{NO}_3^-$ ) concentration trend in the abiotic controls carried out for the inoculum intake tests (A) and for the hydrogen supply tests, i.e., stoichiometry  $\text{H}_2$  supply (B), 50% excess in  $\text{H}_2$  supply (C), and 100% excess in  $\text{H}_2$  supply (D). Cycles of denitrification tests: first cycle (■), second cycle (▲), third cycle (◆).

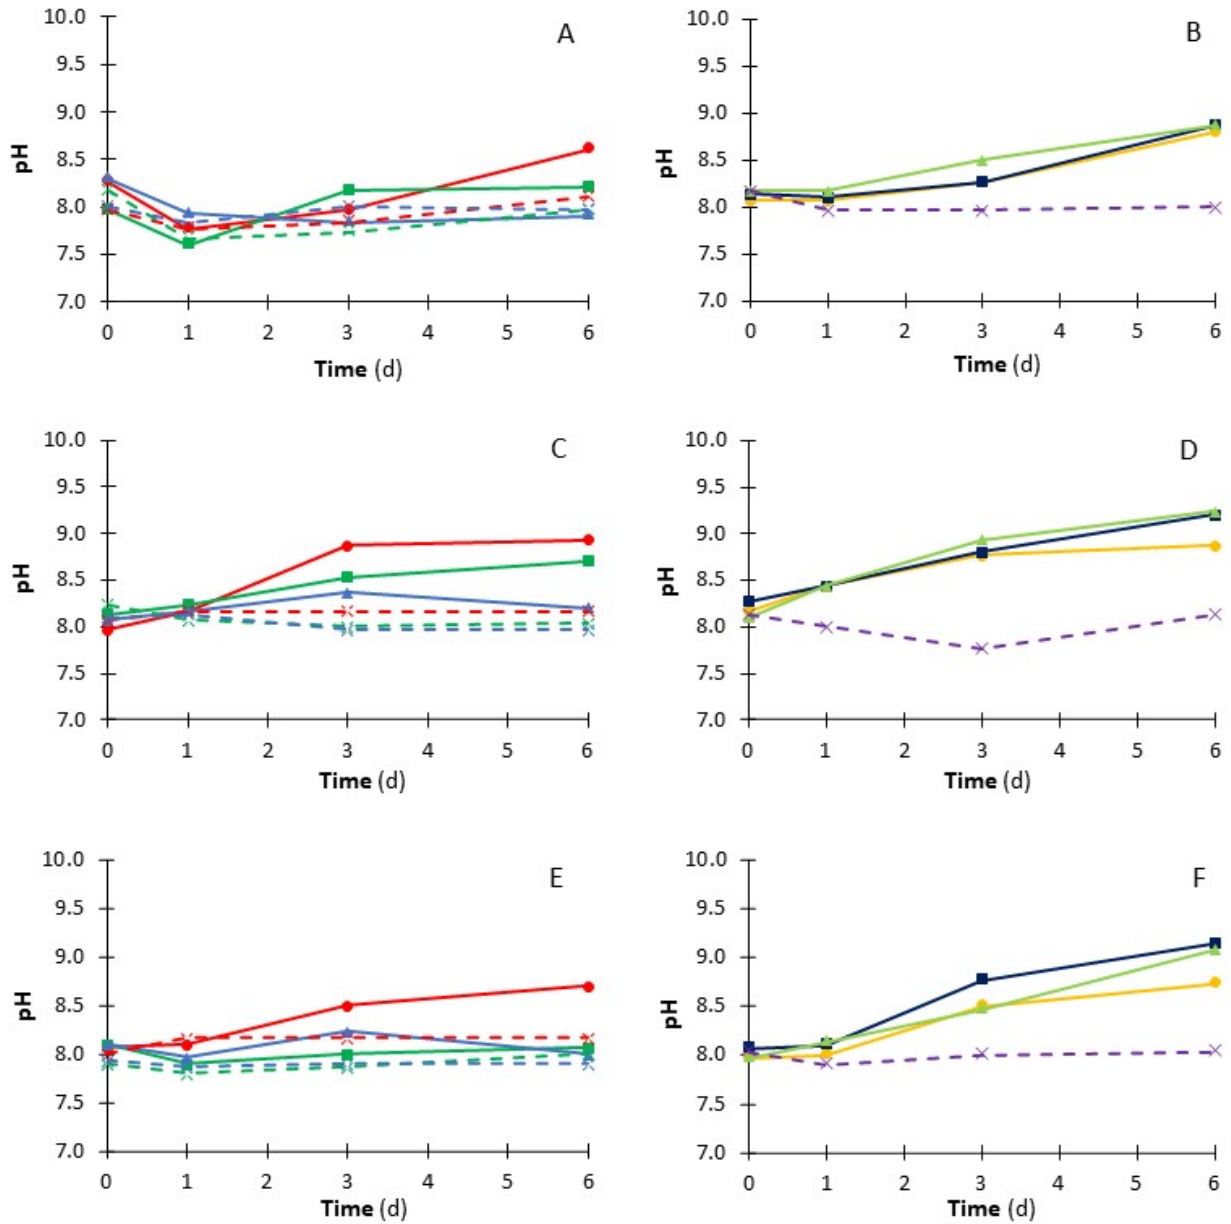

**Figure S2** – pH trend during the hydrogenotrophic denitrification tests in the first (A and B), second (C and D), and third (E and F) cycle using different inoculum intakes, i.e., 10% (I10), 20% (I20) and 40% (I40) (v/v) and varying the hydrogen supply, i.e., stoichiometric (Hst), 50% in excess (H50), and 100% in excess (H100). Inoculum intake tests: I10 (●), I20 (■), I40 (▲). Controls of the inoculum intake tests: C10 (×), C20 (×), C40 (×). Hydrogen supply tests: Hst (●), H50 (■), H100 (▲). Control of the hydrogen supply test: C (×).

**Table S4** – Nitrous oxide (N<sub>2</sub>O) production expressed as percentage (%) in the headspace, with respect to the anaerobic granular sludge (AnGS) intake, and in proportion to the total nitrogen mass removal. First set of experiments (fixed hydrogen (H<sub>2</sub>) supply 50% in excess compared to the stoichiometry): I10 (10% (v/v) inoculum percentage), I20 (20% (v/v) inoculum percentage), and I40 (40% (v/v) inoculum percentage). Second set of experiments (fixed inoculum percentage of 10% (v/v)): Hst (stoichiometric H<sub>2</sub> supply), H50 (H<sub>2</sub> supply 50% in excess compared to the stoichiometry), and H100 (H<sub>2</sub> supply 100% in excess compared to the stoichiometry).

| <b>ID Test</b> | <b>N<sub>2</sub>O production (%)</b> | <b>AnGS intake (mL)</b> | <b>N<sub>2</sub>O production (µg/min/g AnGS)</b> | <b>Nitrogen mass removed (mg)</b> | <b>N<sub>2</sub>O production (%) (mg N-N<sub>2</sub>O produced/ mg nitrogen removed)</b> |
|----------------|--------------------------------------|-------------------------|--------------------------------------------------|-----------------------------------|------------------------------------------------------------------------------------------|
| I10            | 0.180                                | 12.5                    | $4.03 \cdot 10^{-3}$                             | 5.2                               | 2.65                                                                                     |
| I20            | 0.200                                | 25.0                    | $2.29 \cdot 10^{-3}$                             | 4.4                               | 3.56                                                                                     |
| I40            | 0.260                                | 50.0                    | $1.54 \cdot 10^{-3}$                             | 5.8                               | 3.66                                                                                     |
| C10            | 0.188                                | 12.5                    | $4.61 \cdot 10^{-3}$                             | 1.3                               | 12.09                                                                                    |
| C20            | 0.183                                | 25.0                    | $2.49 \cdot 10^{-3}$                             | 3.7                               | 4.64                                                                                     |
| C40            | 0.332                                | 50.0                    | $2.22 \cdot 10^{-3}$                             | 5.5                               | 5.56                                                                                     |
| Hst            | 0.129                                | 12.5                    | $2.80 \cdot 10^{-3}$                             | 4.5                               | 3.27                                                                                     |
| H50            | 0.019                                | 12.5                    | $4.11 \cdot 10^{-4}$                             | 4.6                               | 0.30                                                                                     |
| H100           | 0.021                                | 12.5                    | $4.88 \cdot 10^{-4}$                             | 4.9                               | 0.35                                                                                     |
| C              | 0.327                                | 12.5                    | $8.34 \cdot 10^{-3}$                             | 2.7                               | 5.57                                                                                     |

**Table S5** – Headspace gas composition values measured for different inoculum percentages, i.e., 10% (I10), 20% (I20) and 40% (I40) (v/v) and for control tests. All data are reported for the triplicate.

| Test         | Gas composition (%)   |                 |                                 |                |      |                  |                 |                       |                 |                                 |                |      |                  |                 |                       |                 |                                 |                |      |                  |                 |
|--------------|-----------------------|-----------------|---------------------------------|----------------|------|------------------|-----------------|-----------------------|-----------------|---------------------------------|----------------|------|------------------|-----------------|-----------------------|-----------------|---------------------------------|----------------|------|------------------|-----------------|
|              | 1 <sup>st</sup> cycle |                 |                                 |                |      |                  |                 | 2 <sup>nd</sup> cycle |                 |                                 |                |      |                  |                 | 3 <sup>rd</sup> cycle |                 |                                 |                |      |                  |                 |
|              | H <sub>2</sub>        | CH <sub>4</sub> | H <sub>2</sub> O <sub>(v)</sub> | N <sub>2</sub> | NO   | N <sub>2</sub> O | CO <sub>2</sub> | H <sub>2</sub>        | CH <sub>4</sub> | H <sub>2</sub> O <sub>(v)</sub> | N <sub>2</sub> | NO   | N <sub>2</sub> O | CO <sub>2</sub> | H <sub>2</sub>        | CH <sub>4</sub> | H <sub>2</sub> O <sub>(v)</sub> | N <sub>2</sub> | NO   | N <sub>2</sub> O | CO <sub>2</sub> |
| <b>I20.1</b> | 0.23                  | 3.05            | 2.27                            | 9.88           | 0.00 | 0.04             | 0.07            | 0.02                  | 0.00            | 0.83                            | 3.95           | 0.41 | 0.11             | 0.19            | 0.01                  | 0.03            | 0.80                            | 4.76           | 0.00 | 0.35             | 0.37            |
| <b>I20.2</b> | 0.05                  | 3.66            | 1.58                            | 9.24           | 0.00 | 0.10             | 0.11            | 0.37                  | 2.72            | 0.79                            | 10.27          | 0.00 | 0.03             | 0.07            | 0.01                  | 0.04            | 0.79                            | 10.08          | 0.00 | 0.05             | 0.00            |
| <b>I20.3</b> | 0.02                  | 2.62            | 1.51                            | 13.37          | 0.00 | 0.09             | 0.15            | 0.05                  | 1.92            | 0.88                            | 8.35           | 0.00 | 0.09             | 0.02            | 0.01                  | 0.02            | 1.02                            | 23.19          | 0.00 | 0.35             | 0.30            |
| <b>C20.1</b> | 0.01                  | 0.19            | 1.58                            | 4.62           | 0.00 | 0.17             | 0.21            | 0.02                  | 0.02            | 0.89                            | 5.02           | 0.15 | 0.16             | 0.23            | 0.01                  | 0.03            | 0.85                            | 4.68           | 0.00 | 0.33             | 0.38            |
| <b>C20.2</b> | 0.00                  | 0.03            | 2.26                            | 6.90           | 0.00 | 0.15             | 0.22            | 0.02                  | 0.07            | 0.78                            | 4.01           | 0.00 | 0.23             | 0.23            | 0.19                  | 0.00            | 0.78                            | 5.95           | 0.12 | 0.06             | 0.12            |
| <b>C20.3</b> | 0.00                  | 0.01            | 2.64                            | 9.68           | 0.02 | 0.21             | 0.28            | 0.01                  | 0.09            | 1.03                            | 11.93          | 0.00 | 0.10             | 0.07            | 0.01                  | 0.00            | 0.82                            | 3.06           | 0.00 | 0.24             | 0.20            |
| <b>I10.1</b> | 0.00                  | 0.92            | 2.96                            | 15.64          | 0.00 | 0.00             | 0.15            | 2.58                  | 1.07            | 1.62                            | 9.75           | 0.00 | 0.04             | 0.01            | 0.01                  | 1.12            | 1.12                            | 21.71          | 0.00 | 0.46             | 0.57            |
| <b>I10.2</b> | 0.00                  | 0.56            | 2.88                            | 12.08          | 0.00 | 0.02             | 0.06            | 0.12                  | 0.25            | 0.80                            | 10.89          | 0.00 | 0.04             | 0.00            | 0.01                  | 0.43            | 1.16                            | 15.78          | 0.00 | 0.57             | 0.77            |
| <b>I10.3</b> | 0.39                  | 1.70            | 2.82                            | 10.26          | 0.00 | 0.02             | 0.05            | 0.01                  | 0.00            | 0.79                            | 2.55           | 0.11 | 0.21             | 0.32            | 0.02                  | 0.02            | 1.32                            | 11.26          | 0.00 | 0.27             | 0.23            |
| <b>C10.1</b> | 0.00                  | 0.00            | 1.74                            | 3.85           | 0.16 | 0.14             | 0.18            | 0.02                  | 0.00            | 0.67                            | 1.69           | 0.00 | 0.00             | 0.09            | 0.01                  | 0.02            | 1.40                            | 13.97          | 0.00 | 0.28             | 0.32            |
| <b>C10.2</b> | 0.01                  | 0.01            | 1.62                            | 3.77           | 0.00 | 0.14             | 0.23            | 0.02                  | 0.00            | 0.80                            | 7.11           | 0.10 | 0.25             | 0.28            | 0.01                  | 0.00            | 1.11                            | 8.48           | 0.09 | 0.12             | 0.27            |
| <b>C10.3</b> | 0.02                  | 6.60            | 1.73                            | 8.10           | 0.00 | 0.28             | 0.48            | 0.03                  | 5.88            | 0.70                            | 6.71           | 0.00 | 0.13             | 0.24            | 0.01                  | 0.03            | 1.06                            | 13.19          | 0.00 | 0.36             | 0.16            |
| <b>I40.1</b> | 0.02                  | 4.59            | 1.98                            | 14.44          | 0.00 | 0.33             | 0.66            | 0.02                  | 4.57            | 0.70                            | 5.92           | 0.00 | 0.20             | 0.22            | 0.01                  | 0.04            | 0.97                            | 13.26          | 0.00 | 0.18             | 0.14            |
| <b>I40.2</b> | 0.02                  | 0.49            | 0.95                            | 11.58          | 0.00 | 0.00             | 1.13            | 0.02                  | 3.63            | 0.74                            | 8.23           | 0.00 | 0.18             | 0.48            | 0.01                  | 0.07            | 1.09                            | 14.44          | 0.00 | 0.32             | 0.38            |
| <b>I40.3</b> | 0.01                  | 1.20            | 1.49                            | 6.00           | 0.00 | 0.42             | 0.51            | 0.03                  | 0.56            | 0.78                            | 5.35           | 0.00 | 0.46             | 0.48            | 0.01                  | 0.09            | 1.09                            | 14.85          | 0.00 | 0.30             | 0.39            |
| <b>C40.1</b> | 0.01                  | 0.88            | 1.31                            | 3.74           | 0.00 | 0.58             | 1.01            | 0.03                  | 0.82            | 0.79                            | 6.51           | 0.00 | 0.44             | 0.59            | 0.01                  | 0.05            | 0.91                            | 13.15          | 0.00 | 0.16             | 0.16            |
| <b>C40.2</b> | 0.02                  | 0.36            | 0.97                            | 3.29           | 0.00 | 0.26             | 0.41            | 0.03                  | 0.39            | 0.69                            | 5.27           | 0.00 | 0.27             | 0.79            | 0.01                  | 0.00            | 0.88                            | 2.57           | 0.05 | 0.24             | 0.21            |
| <b>C40.3</b> | 0.01                  | 1.00            | 1.64                            | 4.27           | 0.00 | 0.70             | 1.06            | 0.02                  | 0.40            | 0.72                            | 4.68           | 0.00 | 0.34             | 0.64            | 0.02                  | 0.53            | 1.04                            | 3.53           | 0.00 | 0.00             | 0.45            |

The complement to 100% is represented by the Argon gas used to flush the bottles at the beginning of the experiments.



**Table S6** – Headspace gas composition values measured for the different hydrogen supply, i.e., stoichiometric (Hst), 50% in excess (H50), and 100% in excess (H100) and in control test. All data are reported for the triplicate.

| Test          | Gas composition (%)   |                 |                                 |                |      |                 |                  |                       |                 |                                 |                |      |                 |                  |                       |                 |                                 |                |      |                 |                  |
|---------------|-----------------------|-----------------|---------------------------------|----------------|------|-----------------|------------------|-----------------------|-----------------|---------------------------------|----------------|------|-----------------|------------------|-----------------------|-----------------|---------------------------------|----------------|------|-----------------|------------------|
|               | 1 <sup>st</sup> cycle |                 |                                 |                |      |                 |                  | 2 <sup>nd</sup> cycle |                 |                                 |                |      |                 |                  | 3 <sup>rd</sup> cycle |                 |                                 |                |      |                 |                  |
|               | H <sub>2</sub>        | CH <sub>4</sub> | H <sub>2</sub> O <sub>(v)</sub> | N <sub>2</sub> | NO   | CO <sub>2</sub> | N <sub>2</sub> O | H <sub>2</sub>        | CH <sub>4</sub> | H <sub>2</sub> O <sub>(v)</sub> | N <sub>2</sub> | NO   | CO <sub>2</sub> | N <sub>2</sub> O | H <sub>2</sub>        | CH <sub>4</sub> | H <sub>2</sub> O <sub>(v)</sub> | N <sub>2</sub> | NO   | CO <sub>2</sub> | N <sub>2</sub> O |
| <b>C.1</b>    | 0.03                  | 0.064           | 1.12                            | 3.61           | 0.00 | 0.08            | 0.07             | 0.01                  | 0.02            | 1.31                            | 2.24           | 0.00 | 0.24            | 0.28             | 0.02                  | 0.00            | 1.57                            | 2.14           | 0.02 | 0.14            | 0.57             |
| <b>C.2</b>    | 0.01                  | 0.03            | 1.12                            | 2.80           | 0.42 | 0.08            | 0.08             | 0.01                  | 0.02            | 1.27                            | 1.49           | 0.00 | 0.18            | 0.35             | 0.02                  | 0.02            | 1.70                            | 2.08           | 0.00 | 0.22            | 0.61             |
| <b>C.3</b>    | 0.01                  | 0.05            | 1.07                            | 2.78           | 0.00 | 0.08            | 0.04             | 0.01                  | 0.01            | 1.41                            | 2.69           | 0.00 | 0.20            | 0.26             | 0.02                  | 0.02            | 1.83                            | 5.04           | 0.00 | 0.28            | 0.68             |
| <b>Hst.1</b>  | 1.96                  | 0.24            | 1.33                            | 6.05           | 0.00 | 0.05            | 0.00             | 0.04                  | 0.65            | 2.99                            | 7.12           | 0.00 | 0.00            | 0.09             | 0.01                  | 0.07            | 1.80                            | 6.17           | 0.00 | 0.03            | 0.04             |
| <b>Hst.2</b>  | 1.49                  | 0.22            | 1.25                            | 6.46           | 0.00 | 0.03            | 0.01             | 0.14                  | 0.75            | 1.54                            | 6.87           | 0.00 | 0.06            | 0.04             | 0.01                  | 0.11            | 1.85                            | 5.18           | 0.00 | 0.03            | 0.14             |
| <b>Hst.3</b>  | 0.96                  | 0.14            | 1.29                            | 9.23           | 0.00 | 0.01            | 0.03             | 0.01                  | 0.02            | 1.68                            | 28.89          | 0.00 | 0.10            | 0.41             | 0.02                  | 0.02            | 1.88                            | 8.42           | 0.00 | 0.10            | 0.39             |
| <b>H50.1</b>  | 3.86                  | 0.17            | 1.47                            | 7.68           | 0.89 | 0.03            | 0.00             | 2.79                  | 0.58            | 1.77                            | 6.66           | 0.00 | 0.03            | 0.02             | 3.29                  | 0.19            | 2.20                            | 5.80           | 0.00 | 0.00            | 0.05             |
| <b>H50.2</b>  | 3.83                  | 0.56            | 1.47                            | 7.81           | 2.46 | 0.07            | 0.00             | 0.78                  | 1.02            | 1.62                            | 10.35          | 0.00 | 0.03            | 0.04             | 3.30                  | 0.21            | 2.55                            | 6.98           | 0.23 | 0.00            | 0.05             |
| <b>H50.3</b>  | 2.63                  | 0.20            | 1.48                            | 7.72           | 0.27 | 0.06            | 0.00             | 2.95                  | 1.06            | 1.78                            | 6.38           | 0.00 | 0.04            | 0.01             | 3.32                  | 0.31            | 2.31                            | 6.07           | 0.48 | 0.04            | 0.00             |
| <b>H100.1</b> | 1.21                  | 0.18            | 1.21                            | 20.76          | 0.00 | 0.01            | 0.04             | 4.09                  | 0.93            | 1.94                            | 7.38           | 2.17 | 0.03            | 0.01             | 6.52                  | 0.17            | 1.99                            | 5.13           | 0.67 | 0.03            | 0.02             |
| <b>H100.2</b> | 8.33                  | 0.40            | 1.32                            | 6.37           | 0.69 | 0.02            | 0.01             | 6.19                  | 0.70            | 2.00                            | 7.55           | 2.79 | 0.02            | 0.02             | 5.37                  | 0.25            | 1.96                            | 5.69           | 0.85 | 0.03            | 0.01             |
| <b>H100.3</b> | 2.56                  | 0.59            | 2.31                            | 20.43          | 0.00 | 0.04            | 0.04             | 3.76                  | 0.96            | 2.00                            | 8.55           | 1.99 | 0.03            | 0.01             | 6.12                  | 0.29            | 2.38                            | 7.05           | 0.72 | 0.01            | 0.03             |

The complement to 100% is represented by the Argon gas used to flush the bottles at the beginning of the experiments.
