# Supplementary figures and images for: Effect of inoculum percentage and hydrogen supply on hydrogenotrophic denitrification driven by anaerobic granular sludge
Source: Royal Society of Chemistry journal article supplement (doi:10.1039/d4ew00776j), 2025-01-01

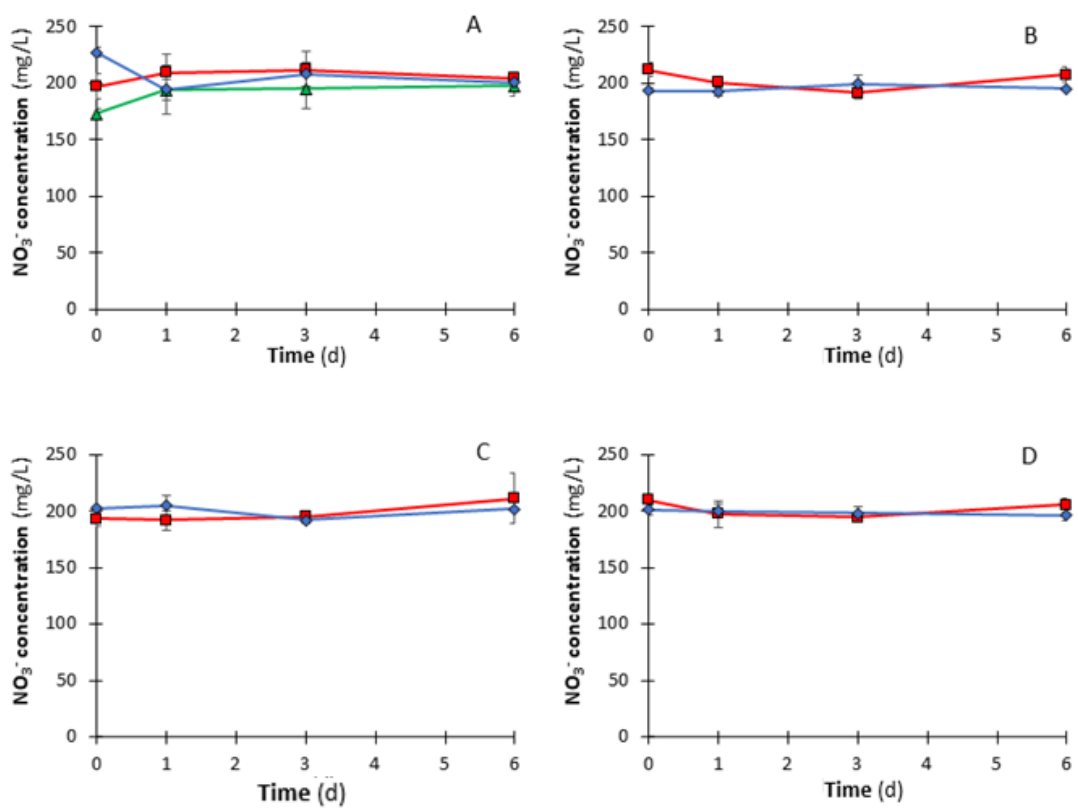

Figure S1

Supplement: d4ew00776j1.pdf [file d4ew00776j1.pdf]

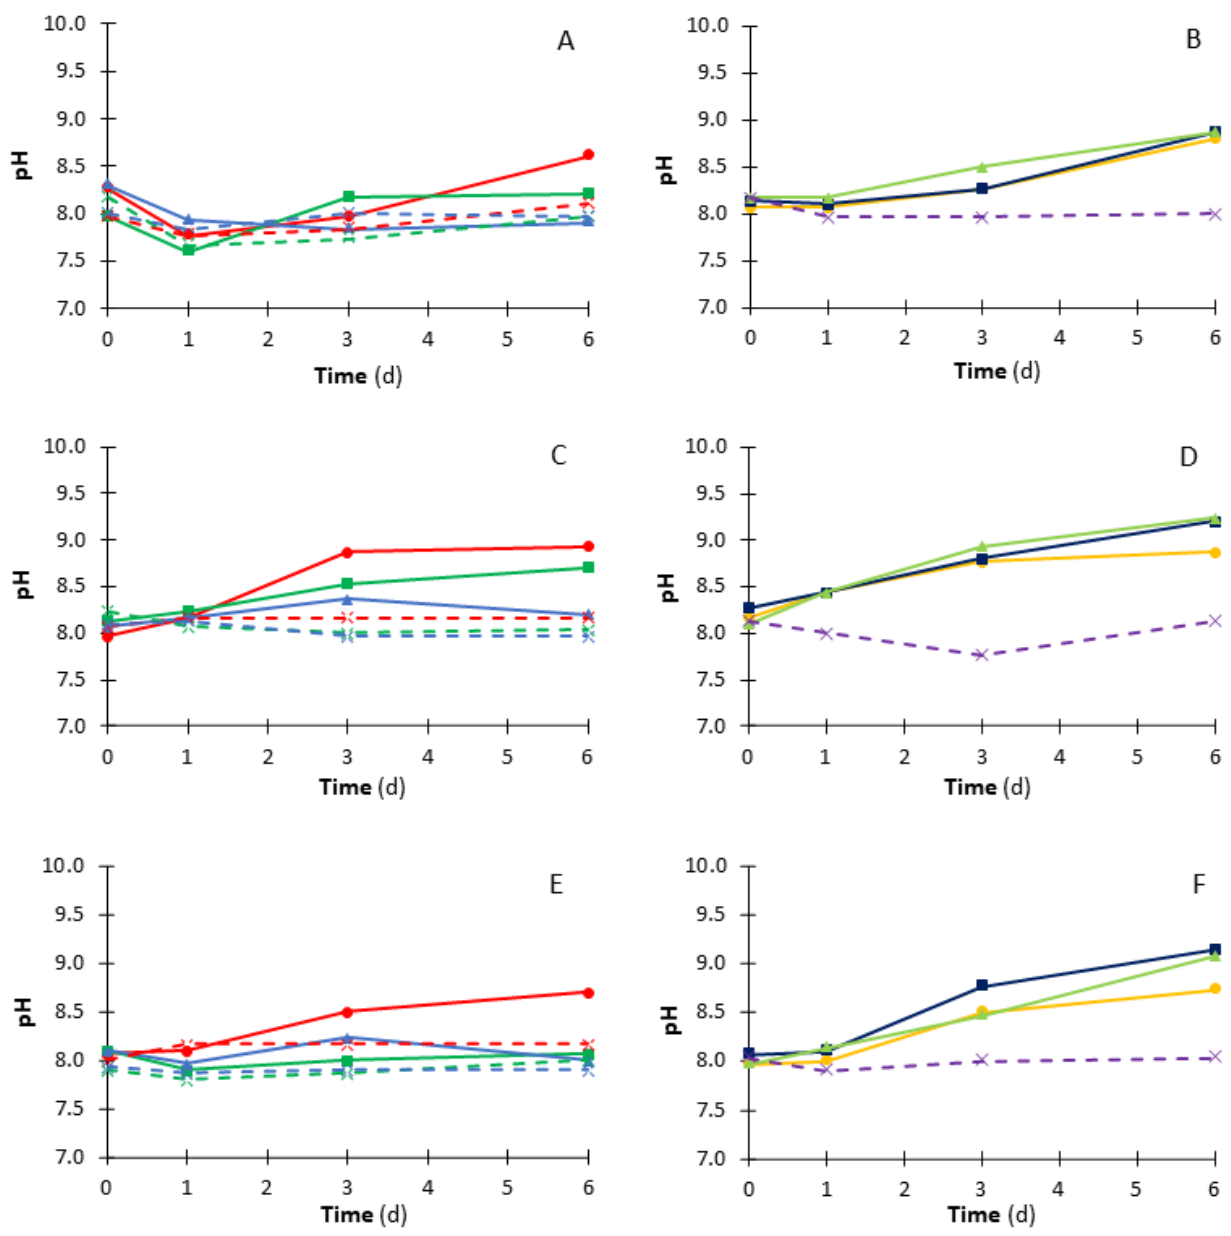

Figure S2

Supplement: d4ew00776j2.pdf [file d4ew00776j2.pdf]
